# Supplementary material
Source: PubMed Central journal article supplement (PMC5696643)

**Figure e-1.** Consecutive admitted patients with spontaneous symptomatic ICH (presumed to be due to small vessel disease after adequate evaluation who had MRI and were enrolled in an ongoing cohort study

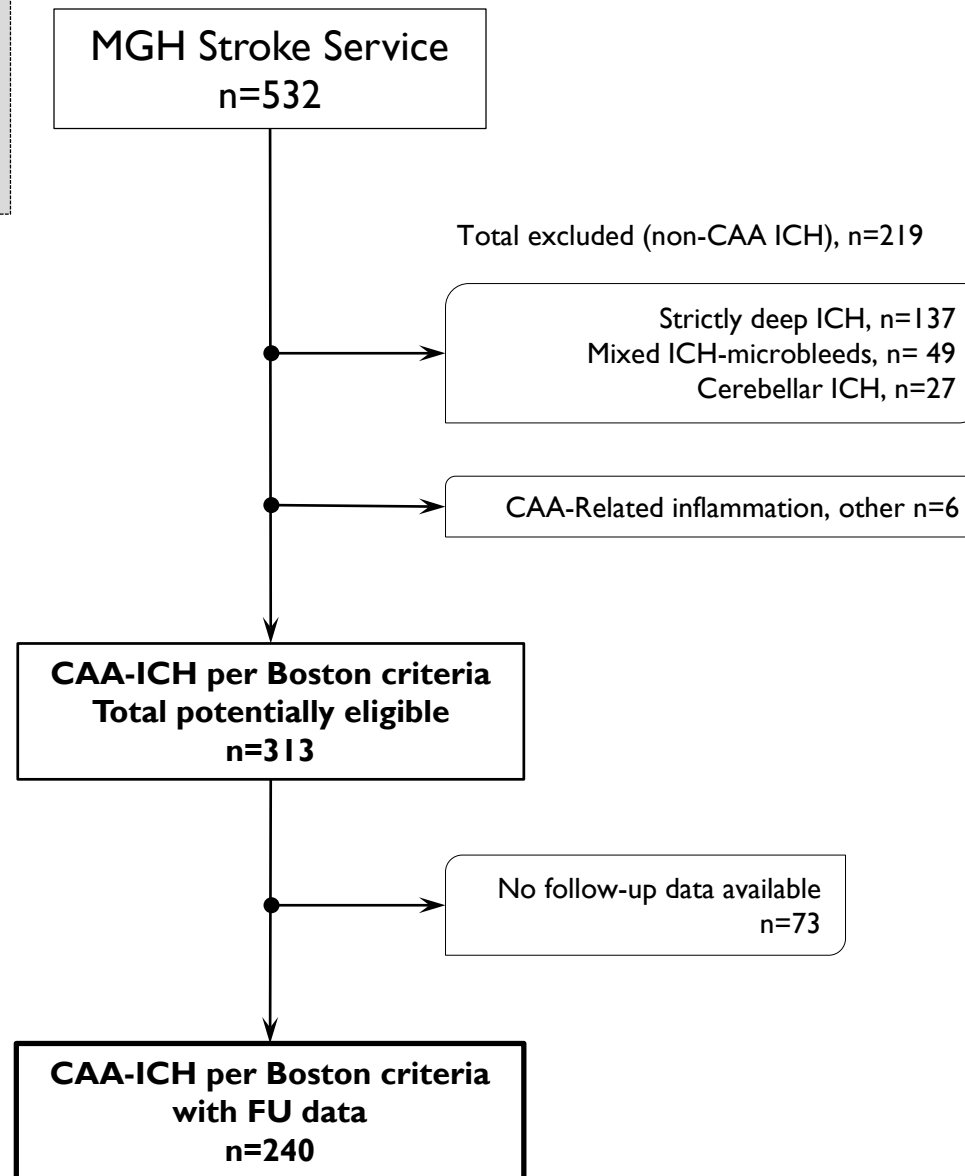

Supplement: supp_WNL.0000000000004665_Figure_e-1.pdf [file supp_WNL.0000000000004665_Figure_e-1.pdf]
